# Supplementary material for: Doping strategy and mechanism for oxide and sulfide solid electrolytes with high ionic conductivity
Source: Royal Society of Chemistry journal article supplement (doi:10.1039/d1ta10966a), 2022-01-01
Supplement: d1ta10966a1.pdf [file d1ta10966a1.pdf]

## Supporting Information

### Doping Strategy and Mechanism for Oxide and Sulfide Solid

#### Electrolytes with High Ionic Conductivity

*Yue Wang,<sup>1-5</sup> Yujing Wu,<sup>1-4</sup> Zhixuan Wang,<sup>1-4</sup> Liquan Chen,<sup>1-4</sup> Hong Li,<sup>1-5\*</sup> and Fan Wu<sup>1-5\*</sup>*

<sup>1</sup>Tianmu Lake Institute of Advanced Energy Storage Technologies, Liyang 213300, Jiangsu, China;

<sup>2</sup>Yangtze River Delta Physics Research Center, Liyang 213300, Jiangsu, China;

<sup>3</sup>Key Laboratory for Renewable Energy, Beijing Key Laboratory for New Energy Materials and Devices,

Beijing National Laboratory for Condensed Matter Physics, Institute of Physics, Chinese Academy of

Sciences, Beijing, 100190, China;

<sup>4</sup>University of Chinese Academy of Sciences, Beijing, 100049, China

<sup>5</sup>Nano Science and Technology Institute, University of Science and Technology of China, Suzhou 215123, China

\*Corresponding authors:

[hli@iphy.ac.cn](mailto:hli@iphy.ac.cn); [fwu@iphy.ac.cn](mailto:fwu@iphy.ac.cn)

*Materials Synthesis:* All the synthesis process was performed in a dry argon-filled glove box. For the synthesis of  $\text{Li}_6\text{PS}_5\text{I}$  (LPSI), starting materials  $\text{Li}_2\text{S}$ ,  $\text{P}_2\text{S}_5$ , and  $\text{LiCl}$  were weighed based on the stoichiometric ratio and ball-milled at 600 rpm using a planetary ball-mill apparatus. Following the ball-milling process, the as-prepared precursor was finally loaded into a sealed quartz tube and subsequently annealed at 550 °C to obtain the LPSI SE, which was grounded in an agate mortar for further use.

*Material Characterization :* X-ray diffraction (XRD) patterns were carried out on a Bruker AXS D8 Advance with a Cu  $K\alpha$  radiation of  $\lambda = 1.54178 \text{ \AA}$  over the range of  $10^\circ \leq 2\theta \leq 80^\circ$ .

*Ionic Conductivity Measurements:* Ionic conductivity of prepared sulfide SEs was measured by EIS measurements in the frequency range of 0.1 Hz to 8 MHz and the amplitude of 10 mV, using a Zennium-pro electrochemical workstation.

**Table S1.**  $^{71}\text{Ga}$  NMR Parameters of the Octahedral ( $\text{Ga}^{\text{Oh}}$ ) and Tetrahedral ( $\text{Ga}^{\text{Td}}$ ) Positions Measured for the  $\text{Y}_3\text{Ga}_5\text{O}_{12}$  (YGG) Garnet by Vosegaard et al. and the Parameters Obtained for the LZLGO Material in the Present Work.

| compound/site                               | $\delta_{iso}(\text{ppm})$ | $C_Q(\text{MHz})$    | $\eta_Q$              |
|---------------------------------------------|----------------------------|----------------------|-----------------------|
| YGG <sup>29</sup> / $\text{Ga}^{\text{Oh}}$ | $5.6 \bar{\pm} 1.2$        | $4.1 \bar{\pm} 0.06$ | $0.03 \bar{\pm} 0.04$ |
| YGG <sup>29</sup> / $\text{Ga}^{\text{Td}}$ | $219 \bar{\pm} 19$         | $13.1 \bar{\pm} 0.2$ | $0.05 \bar{\pm} 0.03$ |
| LZLGO/ $\text{Ga}^{\text{Td}}$              | $207 \bar{\pm} 10$         | $12.7 \bar{\pm} 0.3$ | $0.05 \bar{\pm} 0.05$ |

**Table S2.** NPD data of  $\text{Ge}_{0.10}\text{-LLZO}$  determined by Rietveld refinement. Space group:  $\text{Ia}3\text{d}$  (no. 230); lattice parameter:  $a=b=c=12.9635(1) \text{ \AA}$ . R-factors:  $R=7:91$ ,  $\chi^2=12.9$ . Biso is the isotropic atomic displacement parameter; the constraint on this parameter is such that  $\text{Biso}(\text{Li}1) = \text{Biso}(\text{Ge})$ . The density of the  $\text{Ge}_{0.10}\text{-LLZO}$  powder phase is refined as  $5.143 \text{ g cm}^{-3}$ .

| Spices | Site | x/a , y/b,z/c                     | Biso     | Occupancy |
|--------|------|-----------------------------------|----------|-----------|
| Li1    | 24d  | 0.375,0,0.25                      | 2.58(5)  | 2.83(2)   |
| Li2    | 96h  | 0.0997(2),0.6865(2),0.5770(2)     | 0.500    | 3.78(2)   |
| La     | 24c  | 0.125,0,0.25                      | 0.748(6) | 3.000     |
| Zr     | 16a  | 0,0,0                             | 0.724(6) | 2.000     |
| Ge     | 24d  | 0.375,0,0.25                      | 2.58(5)  | 0.100     |
| O      | 96h  | -0.03226(2),0.05363(2),0.14945(2) | 1.142(6) | 12.000    |

**Table S3.** T1 relaxation times for  $^7\text{Li}$  extracted from saturation recovery experiments of  $\text{Li}_{6.55+y}\text{Ga}_{0.15}\text{La}_3\text{Zr}_{2-y}\text{Sc}_y\text{O}_{12}$

| y    | Component | Contribution(%) | T1(s) |
|------|-----------|-----------------|-------|
| 0    | A         | 100             | 0.38  |
| 0.10 | A         | 50              | 0.36  |
|      | B         | 50              | 0.15  |
| 0.20 | A         | 50              | 0.42  |
|      | B         | 50              | 0.17  |

**Table S4.**  $E_a$  and ionic conductivities of  $\text{Li}_{6+x}\text{P}_{1-x}\text{Si}_x\text{S}_5\text{I}$  ( $0 \leq x \leq 0.5$ ) samples

| $\text{Li}_{6+x}\text{P}_{1-x}\text{Si}_x\text{S}_5\text{I}$ | Ionic Conductivity ( $\text{S cm}^{-1}$ ) | Activation Energy(eV) |
|--------------------------------------------------------------|-------------------------------------------|-----------------------|
| X=0                                                          | $3.13 \times 10^{-6}$                     | 0.248                 |
| X=0.1                                                        | $3.10 \times 10^{-5}$                     | 0.264                 |
| X=0.25                                                       | $8.68 \times 10^{-4}$                     | 0.167                 |
| X=0.5                                                        | $7.34 \times 10^{-3}$                     | 0.112                 |
